# Supplementary material
Source: Springer Nature journal article supplement (https://www.springermedizin.de/resource/supplementary/12889_2012_4921_MOESM1_ESM.pdf/9490682)
Supplement: MOESM1 [file 9490682]

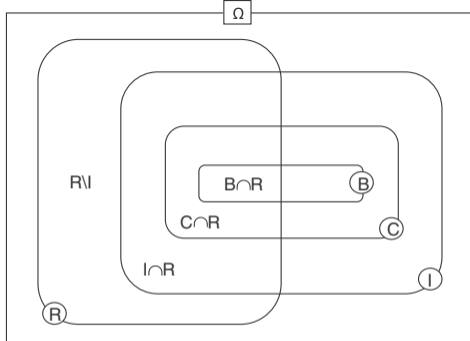

Note:  $\Omega$  = all domains of human experience; R = content of medical reports; I = all 362

second-level ICF categories; C = Comprehensive ICF Core Set categories (for CWP or LBP); B =

Brief ICF Core Set categories (for CWP or LBP).
